# Supplementary material for: Combined Analysis of Plasma Amphiregulin and Heregulin Predicts Response to Cetuximab in Metastatic Colorectal Cancer
Source: PubMed Central journal article supplement (PMC4646631; doi:10.1371/journal.pone.0143132), 2015-11-16
Supplement: pone.0143132.s002.pdf [file pone.0143132.s002.pdf]

Figure A

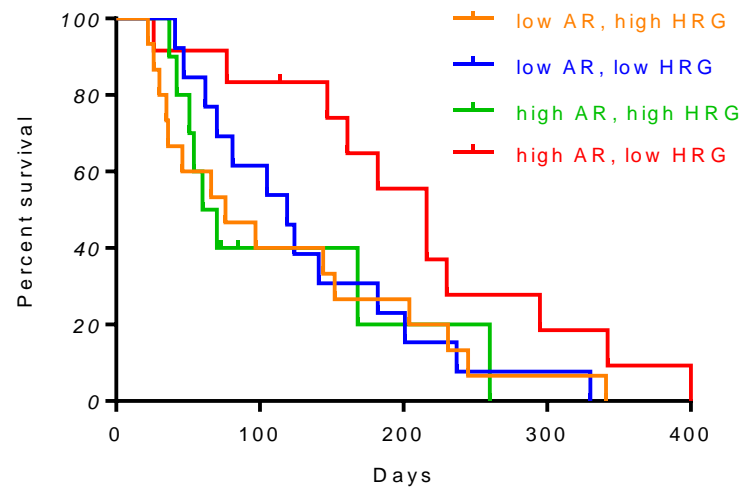

**Figure A. Kaplan-Meier progression-free survival curves.**

Plasma levels of amphiregulin and heregulin were measured by ELISA. Patients were divided into four groups based on amphiregulin or heregulin abundance, as shown in Supplement Figure 1. AR, amphiregulin; HRG, heregulin.

Figure B

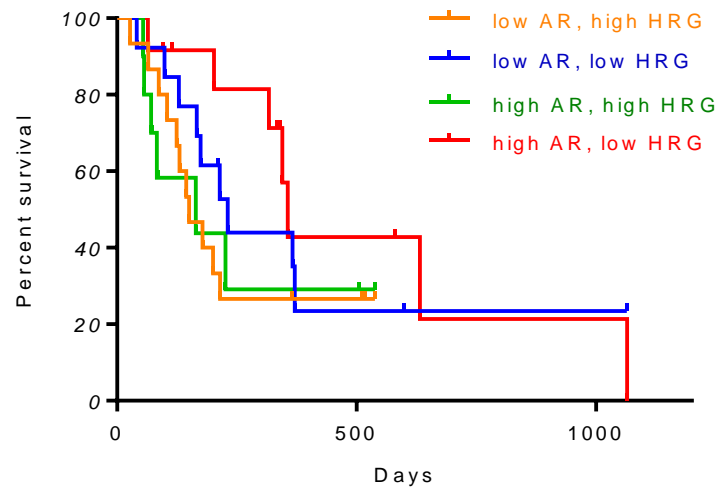

**Figure B. Kaplan-Meier overall survival curves.**

Plasma levels of amphiregulin and heregulin were measured by ELISA. Patients were divided into four groups based on amphiregulin or heregulin abundance, as shown in Supplement Figure 2. AR, amphiregulin; HRG, heregulin.

Figure C

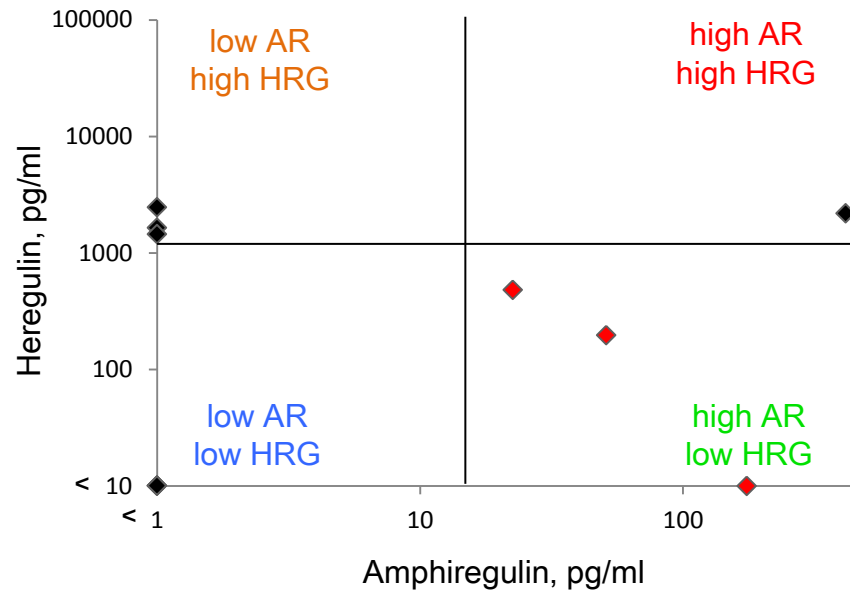

**Figure C. Scatter diagram of plasma amphiregulin and heregulin in validating cohort including 10 patients with colorectal cancer.** Patients were categorized into four groups based on median levels of amphiregulin or heregulin, 16.8pg/ml and 1292pg/ml, respectively. Red dot shows a patient, who achieved response with anti-EGFR.
